# Supplementary material for: Content Comparison of Long-Term Care Instruments Based On The International Classification of Functioning, Disability And Health (ICF)
Source: Research Square preprint supplement (doi:10.21203/rs.3.rs-1223253/v1), 2022-01-14
Supplement: Supplementary file 1 [file 2152cfce16c394bae556ac81.docx]

Table 1

The Long-term care instruments

| Instrument | Country/Region | Administration | Domains/sections |  | Number of items |
| --- | --- | --- | --- | --- | --- |
| Minimum Data Set 3.0, MDS 3.0  New assessment tool for determining dependency on nursing care, NBA  Initial assessment instrument, IAI  Disability assessment of Long-term care, DA-LTC  Specification for elderly care unified need assessment in Shanghai 2.0, SEC-UNA 2.0  Longshi Scale, LS | US-HCFA  Germany-ABMH  Japan-MHLW  Chinese-NHSA&MCA  Chinese-SHHSA  Chinese-MCA | interview/clinical observation  Interview/clinical observation  Interview/clinical examination  Interview/clinical examination  Interview/Self-administered interview/ clinical observation  Interview/clinical examination | 21  8  8  3  8  1 |  | 152  76  85  17  83  9 |

HCFA Health Care Financing Administration; ABMH the Advisory Board and the Ministry of Health; MHLW Ministry of Health, Labor, and Welfare,

NHSA National Healthcare Security Administration; MCA Ministry of Civil Affairs; SHHSA-Shanghai National Healthcare Security Administratio

Table 2

Number of items (%) of long-term instruments containing concepts that address categories of a particular ICF component

|  | MDS 3.0 | NBA | IAI | DA-LTC | SEC-UNA 2.0 | LS |
| --- | --- | --- | --- | --- | --- | --- |
| Number of ICF categories  Number of main concepts  ICF categories per component  Body structures [n (%)]  Body function [n (%)]  Activity and participation [n (%)]  Environment factors [n (%)]  Personal factors [n (%)] | 55  240  2(3.6)  26(47.3)  17(30.9)  5(9.1)  5(9.1) | 35  76  0(0)  8(22.9)  26(74.3)  1(2.9)  0(0) | 32  85  0(0)  14(43.8)  17(53.1)  1(3.0)  0(0) | 23  24  0(0)  9(39.1)  14(60.9)  0(0)  0(0) | 49  80  0(0)  20(40.8)  29(59.2)  0(0)  0(0) | 19  24  0(0)  2(10.5)  17(89.5)  0(0)  0(0) |

Table 3

Linkage of the Long-term care instruments to the ICF categories of the components

| ICF Category | MDS3.0 | IAI | NBA |  | DA-LTC | SEC-UNA 2.0 | LS |
| --- | --- | --- | --- | --- | --- | --- | --- |
| Body structure  s320 Structure of mouth  s810 Structure of areas of skin  Body functions  b110 Consciousness functions  b1100 State of consciousness  b1140 Orientation to time  b1141 Long-term memory  b1142 Orientation to person  b11420 Orientation to self  b117 Intellectual functions  b1266 Psychic stability  b130 Energy and drive functions  b1300 Energy level  b1302 Appetite  b134 Sleep functions  b1400 Sustaining attention  b144 Memory functions  b1440 Short-term memory  b1441 Long-term memory  b1442 Retrieval of memory  b1470 Psychomotor functions  b152 Emotional functions  b1521 Regulation of emotion  b156 Perceptual functions  b1565 Visuospatial perception  b160 Though functions  b1641 Organization and planning  b1671 Expression of language  b1720 Simple calculation  b210 Seeing functions  b230 Hearing functions performance  b280 Sensation of pain  b3300 Fluency of speech  b4400 Respiration rate  b5105 Swallowing  b525 Defecation functions  b5253 Faecal continence  b620 Urination functions  b6202 Urinary continence  b710 Mobility of joint functions  b7108 Mobility of joint functions, other specified  b7356 Tone of muscles of lower half of body  b760 Control of voluntary movement functions  b7600 Control of simple  b810 Protective functions of the skin  Activity and participation  d177 Making decision  d230 Carry out daily routine  d2301 Managing daily routine  d240 Handling stress and other psychological  d310 Communicating with-receiving-spoken messages  d315 Communicating with receiving-nonverbal messages  d350 Conversation  d3600 Using telecommunication devices  d398 Communication, other specified  d410 Changing basic body position  d4100 Lying down  d4103 Sitting  d4104 Standing  d4106 Shifting the body's center of gravity  d4153 Maintaining a sitting position  d4154 Maintaining a standing position  d420 Transferring oneself  d450 Walking  d4500 Walking short distances  d4501 Walking long distances  d4508 Walking, other specified  d4551 Climbing  d4600 Moving around within the home  d4602 Moving around outside the home and other building  d465 Moving around using equipment  d470 Using transportation  d5 Self-care  d510 Washing oneself  d5100 Washing body parts  d5101 Washing whole body  d520 Caring for body part  d5200 Caring for skin  d5201 Caring for teeth  d5202 Caring for hair  d530 Toileting  d5300 Regulating urination  d5301 Regulating defecation  d5308 Toileting, other specified  d540 Dressing  d5400 Putting on clothes  d5401Taking off clothes  d550 Eating  d560 Drinking  d570 Looking after one's health  d5708 Looking after one's health, other specified  d6200 Shopping  d630 Preparing meals  d6300 Preparing simple meals  d640 Doing housework  d6402 Cleaning living area  d710 Basic interpersonal interactions  d720 Complex interpersonal interactions  d860 Basic economic transactions  d910 Community life  d920 Recreation and leisure  d9205 Socializing  d9208 Recreation and leisure, other specified  d9209 Recreation and leisure, unspecified  Environment  e1101 Drugs  e120 Products and technology for personal indoor and outdoor mobility and transportation  e1251 Assistive products and technology for communication  e198 Products and technology, other specified  e5800 Health services  Personal factor  Importance for daily preferences  Importance for activity preference  Height  Weight  Weight loss | 1  6  1  1  1  1  1  1  1  1  2  2  1  1  2  2  2  1  1  1  1  1  1  1  1  1  1  1  1  1  1  1  1  3  1  2  1  1  1  1  1  1  1  1  1  2  1  2  7  31  8  8  1  1  1 | 1  2  1  1  1  1  1  1  1  1  1  1  1  1  1  1  1  1  1  1  2  1  1  1  1  1  1  1  1  1  1  12 | 1  1  1  1  1  1  1  1  1  1  1  1  1  1  1  1  1  1  1  1  1  1  1  1  1  1  1  1  1  1  1  1  1  1  15 |  | 1  1  1  1  1  1  1  1  1  1  1  1  1  1  1  1  1  1  1  1  1  1  1 | 2  2  1  1  1  1  3  2  1  1  1  1  1  1  1  1  1  1  1  1  1  1  1  1  1  1  1  1  1  1  1  2  1  1  1  1  1  1  2  1  2  2  1  1  1  1  1  1  1 | 1  1  1  1  1  1  1  1  1  1  1  1  1  1  1  1  1  1  1 |

ICF International Classification of Functioning, Disability and Health; MDS Minimum Data Set; IAI Initial Assessment Instrument; NBA New Assessment Tool for Determining Dependency on Nursing Care; DA-LTC Chinese Disability Assessment of Long-Term Care; SEC-UNA Chinese specification for Elderly Care Unified Need Assessment in Shanghai; LS Longshi Scale
